# Supplementary material for: Seizure frequency, healthcare resource utilisation and mortality in childhood epilepsy: a retrospective cohort study using the THIN database
Source: PubMed Central journal article supplement — Arch Dis Child. 2019 Jul 4;104(11):1070–6. doi: 10.1136/archdischild-2019-316910 (PMC6837252; doi:10.1136/archdischild-2019-316910), 2019-07-04
Supplement: archdischild-2019-316910supp001.pdf [file archdischild-2019-316910supp001.pdf]

## Section 1.0 Appendix (Supplemental Information)

Table 5. Epilepsy Read codes used to identify patients

| Read code | Description                                                  |
|-----------|--------------------------------------------------------------|
| 6110.00   | Contraceptive advice for patients with epilepsy              |
| 67AF.00   | Pregnancy advice for patients with epilepsy                  |
| 671J000   | Pre-conception advice for patients with epilepsy             |
| 8IAg.00   | Contraceptive advice for patients with epilepsy declined     |
| 8IAh.00   | Pre-conception advice for patients with epilepsy declined    |
| 8IAi.00   | Pregnancy advice for patients with epilepsy declined         |
| 8IB2.00   | Contraceptiv advice for patients with epilepsy not indicated |
| 8IB3.00   | Pre-conception advic fr patients with epilepsy not indicated |
| 8IB4.00   | Pregnancy advice for patients with epilepsy not indicated    |
| 9Of5.00   | Epilepsy monitoring call first letter                        |
| 9Of6.00   | Epilepsy monitoring call second letter                       |
| 9Of7.00   | Epilepsy monitoring call third letter                        |
| 13Y9.00   | Epilepsy society member                                      |
| 1B1W.00   | Transient epileptic amnesia                                  |
| 1O30.00   | Epilepsy confirmed                                           |
| 667..00   | Epilepsy monitoring                                          |
| 6674.00   | Epilepsy associated problems                                 |
| 667B.00   | Nocturnal epilepsy                                           |
| 667C.00   | Epilepsy control good                                        |
| 667D.00   | Epilepsy control poor                                        |
| 667E.00   | Epilepsy care arrangement                                    |
| 667G.00   | Epilepsy restricts employment                                |
| 667H.00   | Epilepsy prevents employment                                 |
| 667J.00   | Epilepsy impairs education                                   |
| 667K.00   | Epilepsy limits activities                                   |
| 667L.00   | Epilepsy does not limit activities                           |
| 667M.00   | Epilepsy management plan given                               |
| 667N.00   | Epilepsy severity                                            |
| 9h6..00   | Exception reporting: epilepsy quality indicators             |
| 9h61.00   | Excepted from epilepsy quality indicators: Patient unsuitabl |
| 9h62.00   | Excepted from epilepsy quality indicators: Informed dissent  |
| Eu05212   | [X]Schizophrenia-like psychosis in epilepsy                  |
| Eu05y11   | [X]Epileptic psychosis NOS                                   |
| Eu06013   | [X]Limbic epilepsy personality                               |
| Eu80300   | [X]Acquired aphasia with epilepsy [Landau - Kleffner]        |
| F132100   | Progressive myoclonic epilepsy                               |
| F25..00   | Epilepsy                                                     |
| F250.00   | Generalised nonconvulsive epilepsy                           |
| F250000   | Petit mal (minor) epilepsy                                   |
| F250100   | Pykno-epilepsy                                               |
| F250400   | Juvenile absence epilepsy                                    |
| F250500   | Lennox-Gastaut syndrome                                      |
| F250y00   | Other specified generalised nonconvulsive epilepsy           |
| F250z00   | Generalised nonconvulsive epilepsy NOS                       |
| F251.00   | Generalised convulsive epilepsy                              |
| F251000   | Grand mal (major) epilepsy                                   |
| F251011   | Tonic-clonic epilepsy                                        |

|                |                                                              |
|----------------|--------------------------------------------------------------|
| <b>F251100</b> | Neonatal myoclonic epilepsy                                  |
| <b>F251111</b> | Otohara syndrome                                             |
| <b>F251500</b> | Tonic-clonic epilepsy                                        |
| <b>F251y00</b> | Other specified generalised convulsive epilepsy              |
| <b>F251z00</b> | Generalised convulsive epilepsy NOS                          |
| <b>F254.00</b> | Partial epilepsy with impairment of consciousness            |
| <b>F254000</b> | Temporal lobe epilepsy                                       |
| <b>F254100</b> | Psychomotor epilepsy                                         |
| <b>F254200</b> | Psychosensory epilepsy                                       |
| <b>F254300</b> | Limbic system epilepsy                                       |
| <b>F254400</b> | Epileptic automatism                                         |
| <b>F254z00</b> | Partial epilepsy with impairment of consciousness NOS        |
| <b>F255.00</b> | Partial epilepsy without impairment of consciousness         |
| <b>F255000</b> | Jacksonian focal or motor epilepsy                           |
| <b>F255011</b> | Focal epilepsy                                               |
| <b>F255012</b> | Motor epilepsy                                               |
| <b>F255100</b> | Sensory induced epilepsy                                     |
| <b>F255200</b> | Somatosensory epilepsy                                       |
| <b>F255300</b> | Visceral reflex epilepsy                                     |
| <b>F255311</b> | Partial epilepsy with autonomic symptoms                     |
| <b>F255400</b> | Visual reflex epilepsy                                       |
| <b>F255500</b> | Unilateral epilepsy                                          |
| <b>F255y00</b> | Partial epilepsy without impairment of consciousness OS      |
| <b>F255z00</b> | Partial epilepsy without impairment of consciousness NOS     |
| <b>F256.00</b> | Infantile spasms                                             |
| <b>F256.11</b> | Lightning spasms                                             |
| <b>F256.12</b> | West syndrome                                                |
| <b>F256000</b> | Hypsarrhythmia                                               |
| <b>F256100</b> | Salaam attacks                                               |
| <b>F256z00</b> | Infantile spasms NOS                                         |
| <b>F257.00</b> | Kojevnikov's epilepsy                                        |
| <b>F259.00</b> | Early infant epileptic encephalopathy wth suppression bursts |
| <b>F259.11</b> | Ohtahara syndrome                                            |
| <b>F25A.00</b> | Juvenile myoclonic epilepsy                                  |
| <b>F25B.00</b> | Alcohol-induced epilepsy                                     |
| <b>F25C.00</b> | Drug-induced epilepsy                                        |
| <b>F25D.00</b> | Menstrual epilepsy                                           |
| <b>F25E.00</b> | Stress-induced epilepsy                                      |
| <b>F25F.00</b> | Photosensitive epilepsy                                      |
| <b>F25y.00</b> | Other forms of epilepsy                                      |
| <b>F25y000</b> | Cursive (running) epilepsy                                   |
| <b>F25y100</b> | Gelastic epilepsy                                            |
| <b>F25y200</b> | Locl-rlt(foc)(part)idiop epilep&epilptic syn seiz locl onset |
| <b>F25y400</b> | Benign Rolandic epilepsy                                     |
| <b>F25y500</b> | Panayiotopoulos syndrome                                     |
| <b>F25yz00</b> | Other forms of epilepsy NOS                                  |
| <b>F25z.00</b> | Epilepsy NOS                                                 |
| <b>Fyu5000</b> | [X]Other generalized epilepsy and epileptic syndromes        |
| <b>Fyu5100</b> | [X]Other epilepsy                                            |
| <b>SC20000</b> | Traumatic epilepsy                                           |
| <b>ZS82.00</b> | Acquired epileptic aphasia                                   |
| <b>ZS82.11</b> | Landau-Kleffner syndrome                                     |

|         |                                      |
|---------|--------------------------------------|
| F25G.11 | Dravet syndrome                      |
| PKyz511 | Angelman syndrome                    |
| PKyz700 | Angelman's syndrome                  |
| PKyz711 | Angelman syndrome                    |
| PKy0.11 | Prader-Willi Syndrome                |
| PKy0.12 | Prader-Willi syndrome                |
| PKy9300 | Prader - Willi syndrome              |
| PJ32.11 | Wolff - Hirschorn syndrome           |
| F250500 | Lennox-Gastaut syndrome              |
| F250400 | Juvenile absence epilepsy            |
| F25G.00 | Severe myoclonic epilepsy in infancy |
| F132111 | Unverricht - Lundborg disease        |
| F132z11 | Unverricht - Lundborg disease        |

Table 6. Change in seizure frequency amongst patients who recorded at least one frequency which differed from index frequency

| First*                | Last**         |                 |                  |                      |                       | Overall |
|-----------------------|----------------|-----------------|------------------|----------------------|-----------------------|---------|
|                       | At least daily | At least weekly | At least monthly | At least once a year | Less than once a year |         |
| At least daily        | -              | ***             | ***              | 6                    | 22                    | 38      |
| At least weekly       | 10             | -               | ***              | ***                  | 41                    | 72      |
| At least monthly      | ***            | 14              | -                | ***                  | 47                    | 78      |
| At least once a year  | ***            | ***             | 17               | -                    | 151                   | 178     |
| Less than once a year | 10             | 13              | 25               | 66                   | -                     | 114     |
| Overall               | 27             | 40              | 61               | 91                   | 261                   | 480     |

\*\*\* Patient counts <6 or results enabling the calculation of counts <6 cannot be disclosed due to restrictions imposed by the UK government to protect patient privacy.

Table 6: Mortality rate for each category of seizure frequency (using last recorded seizure frequency)

| Seizure frequency            | N     | Number of deaths | Patient-years of follow-up | Mortality rate (per 100,000 patient-years) |
|------------------------------|-------|------------------|----------------------------|--------------------------------------------|
| Any frequency (all patients) | 3,324 | 11               | 8,506                      | 129.3                                      |
| At least daily               | 347   | 7                | 965                        | 725.4                                      |
| At least weekly              | 376   | ***              | ***                        | 106.7                                      |

|                       |      |     |      |       |
|-----------------------|------|-----|------|-------|
| At least monthly      | 418  | *** | ***  | 95.2  |
| At least once a year  | 822  | *** | ***  | 104.7 |
| Less than once a year | 1361 | 0   | 3644 | 0     |

---

\*\*\* Patient counts <6 or results enabling the calculation of counts <6 cannot be disclosed due to restrictions imposed by the UK government to protect patient privacy.
